# Supplementary material for: Comparison of Xenorhabdus bovienii bacterial strain genomes reveals diversity in symbiotic functions
Source: PubMed Central journal article supplement (PMC4630870; doi:10.1186/s12864-015-2000-8), 2015-11-02

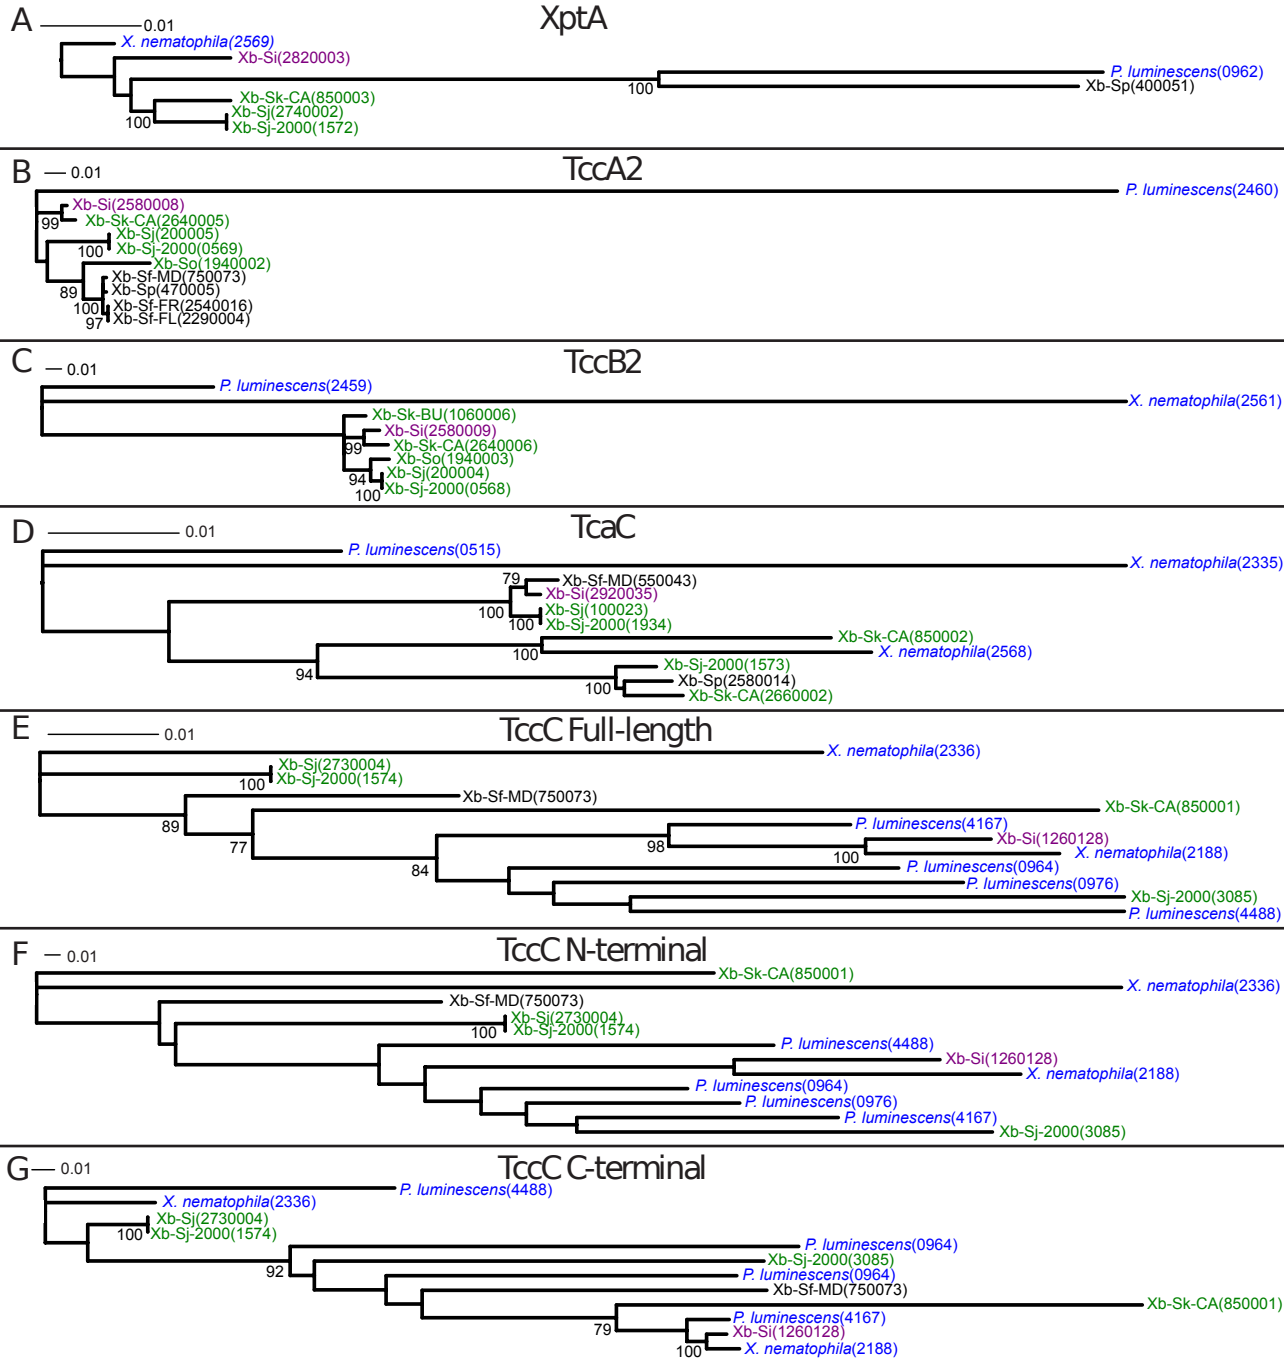

Supplement: 12864_2015_2000_MOESM11_ESM.pdf [file 12864_2015_2000_MOESM11_ESM.pdf]
